# Supplementary material for: Microsphere assembly of TiO2 with tube-in-tube nanostructures: anisotropic etching and photovoltaic enhancement
Source: Royal Society of Chemistry journal article supplement (doi:10.1039/c3ce41259h), 2013-01-01
Supplement: c3ce41259h.pdf [file c3ce41259h.pdf]

# Microsphere Assembly of TiO<sub>2</sub> with Tube-in-Tube Nanostructures : Anisotropic Etching and Photovoltaic Enhancement

ZhongQiu Bao,<sup>a,c</sup> Haixian Xie,<sup>a,c</sup> Qing Zhu,<sup>a,c</sup> Jieshu Qian,<sup>b</sup> Peng Ruan,<sup>a</sup> Xingfu Zhou<sup>a\*</sup>.

<sup>a</sup>*State Key Laboratory of Materials-Oriented Chemical Engineering, College of Chemistry and Chemical Engineering, Nanjing University of Technology, Nanjing 210009, P.R. China,*

<sup>b</sup>*School of Chemistry, University of Bristol, Bristol BS8 1TS, United Kingdom*

<sup>c</sup>These authors contributed equally to this work.

Corresponding author: E-mail: [zhouxf@njut.edu.cn](mailto:zhouxf@njut.edu.cn)

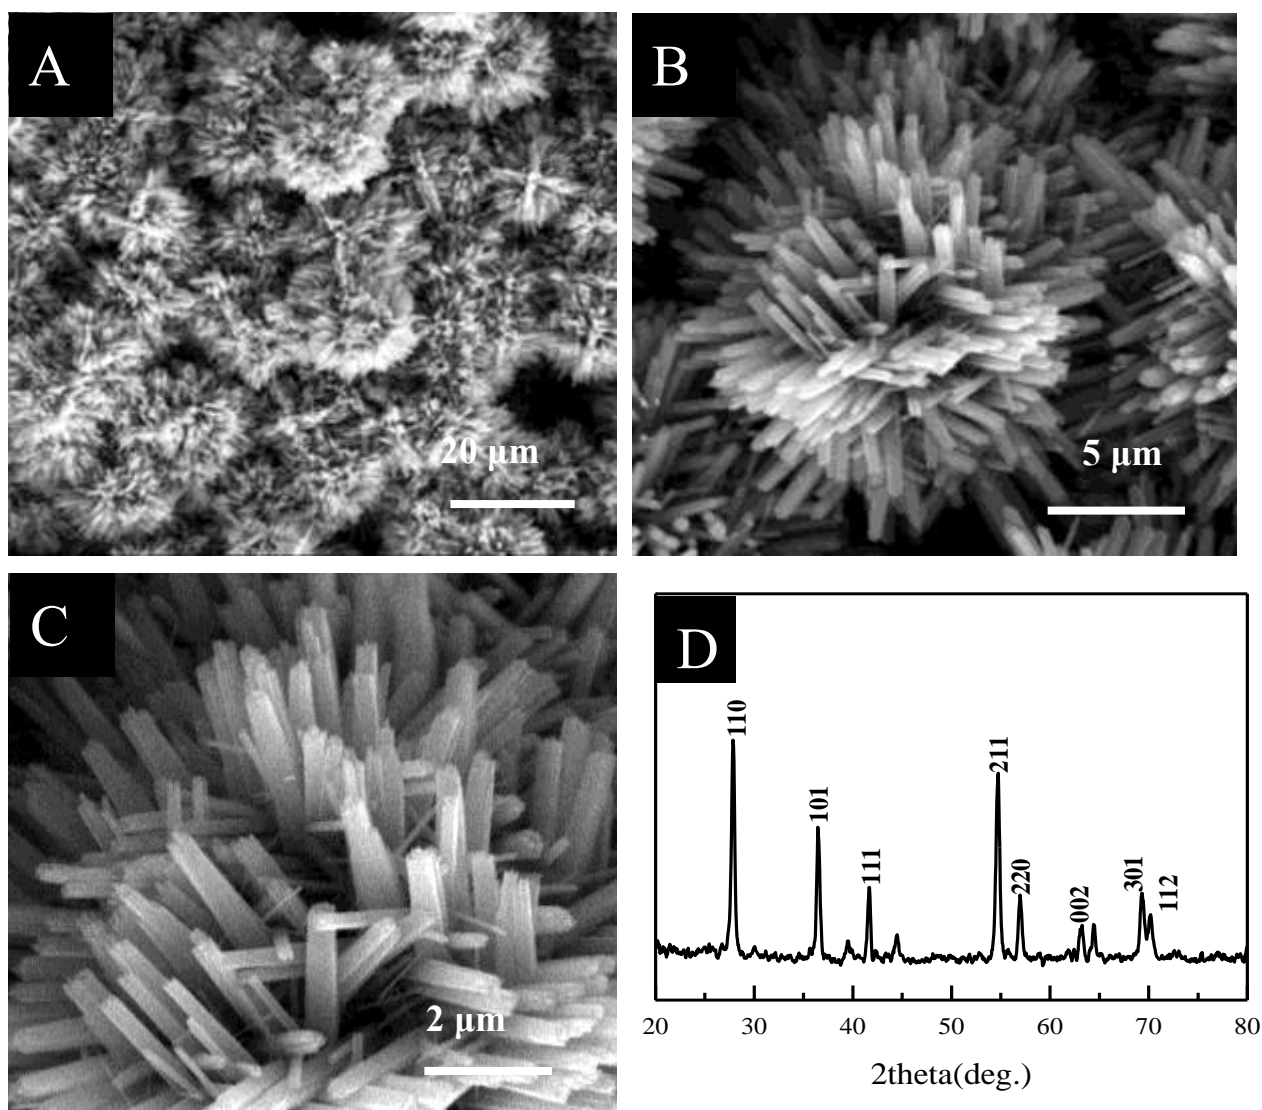

Figure S1. (A) A SEM image showing the overview of the TiO<sub>2</sub> microsphere (R) sample. (B) A SEM image of an individual TiO<sub>2</sub> microsphere. (C) A magnified SEM image showing the surface of the microsphere. (D) XRD patterns of the TiO<sub>2</sub> microsphere (R) sample.

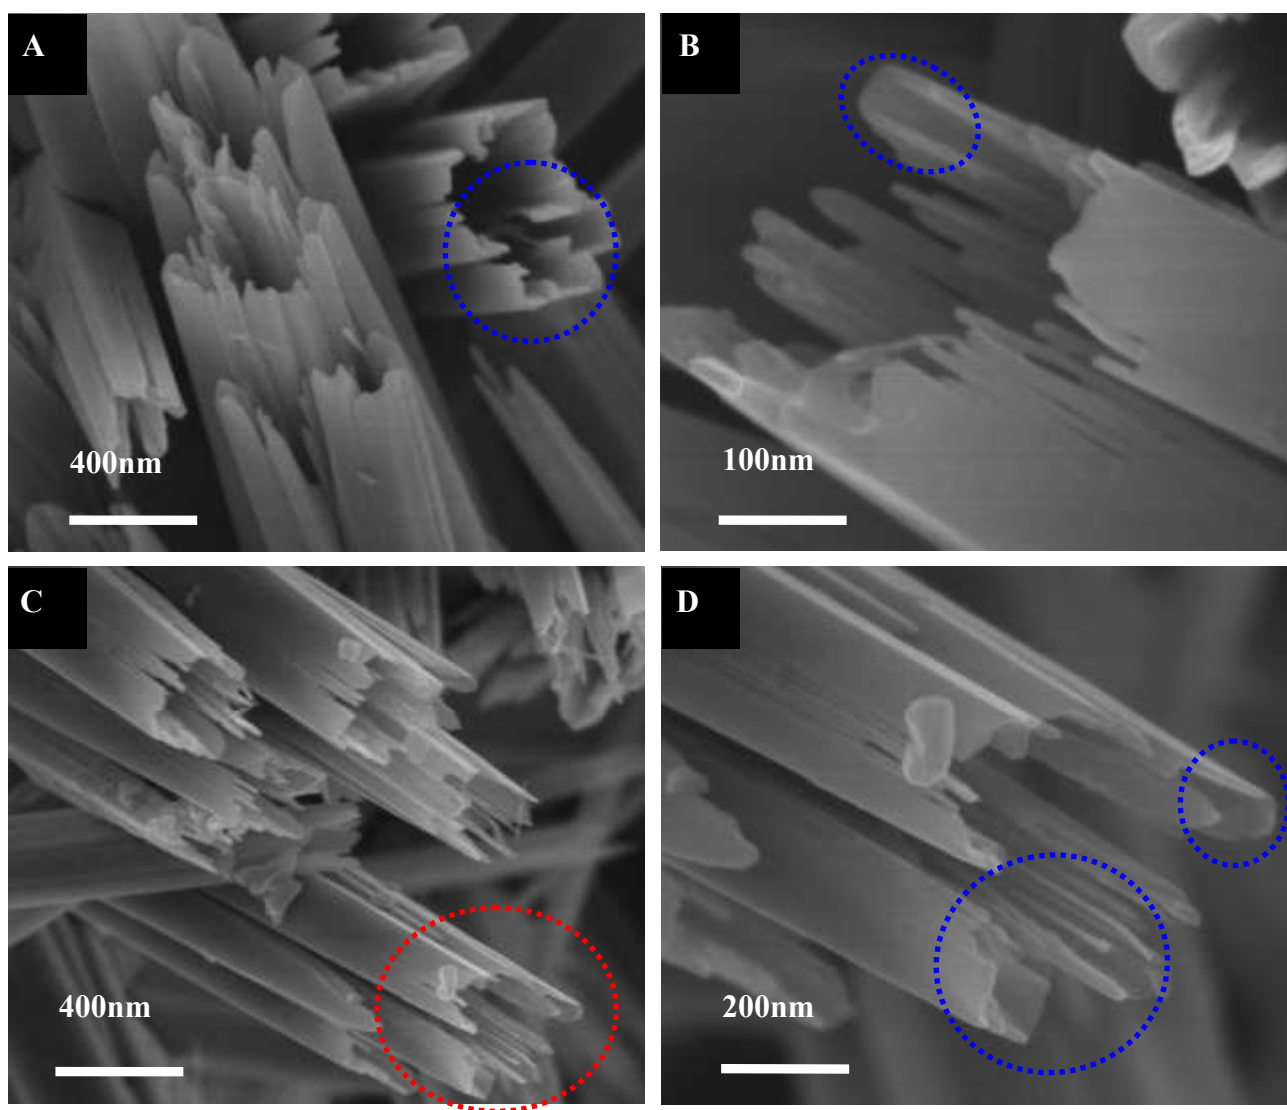

Figure S2. (A-D) FESEM images emphasizing the tubular structures of the TiO<sub>2</sub> microsphere (T) sample. Blues dashed circles in (A, B, and C) indicate that the wall of these nanotubes also have tubular structures, the so-called tube-in-tube structures. (D) magnified images of the region in red dashed circle in (C).

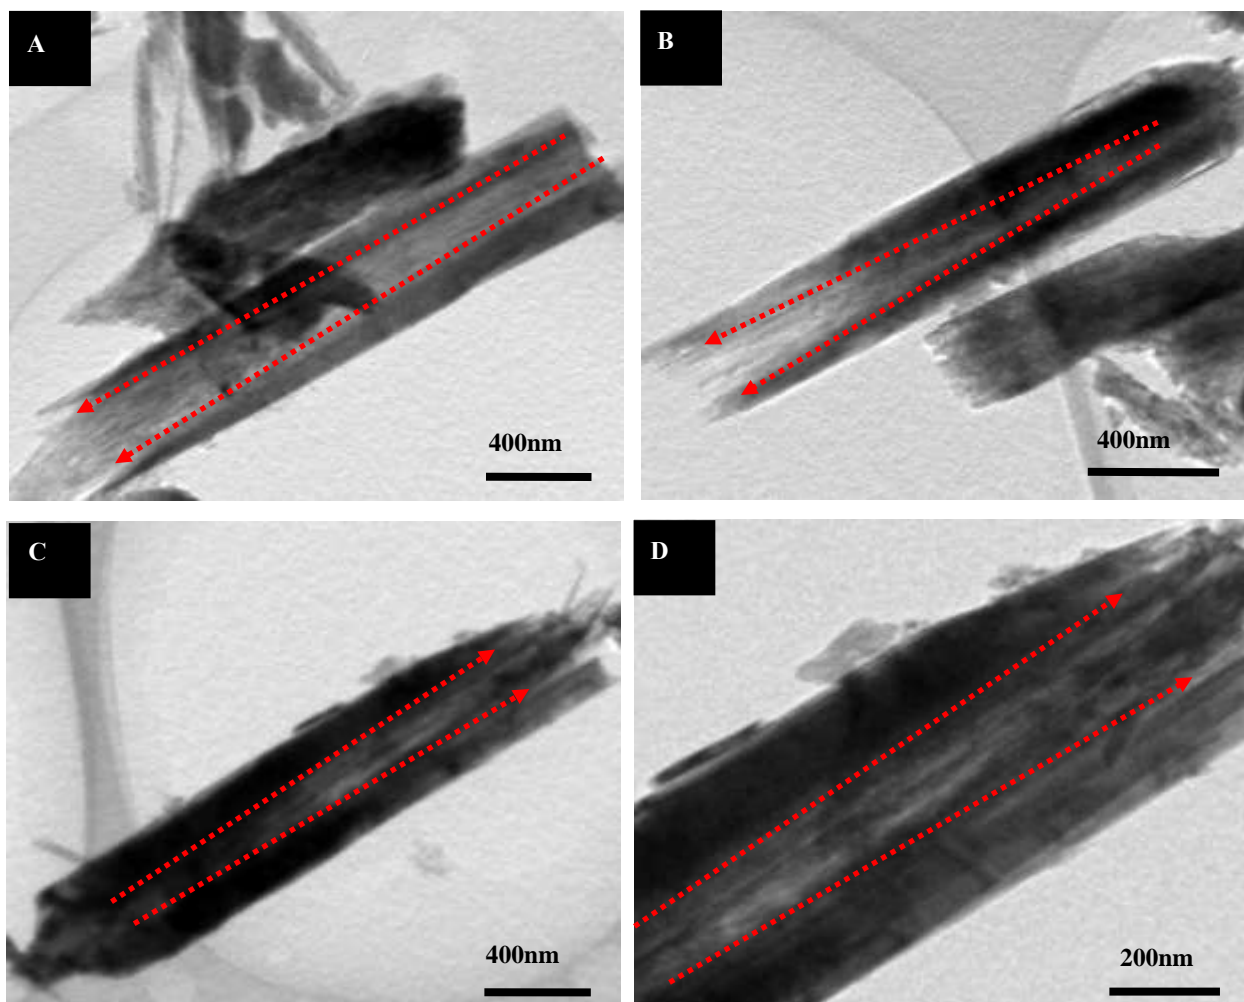

Figure S3. (A, B, and C) TEM images of TiO<sub>2</sub> nanotubes. (D) A magnified TEM image of the same nanotube as shown in (C). Red dashed lines in all images illustrate the V-shaped spaces inside the nanotubes, while the arrows point to the open ends of the nanotubes.

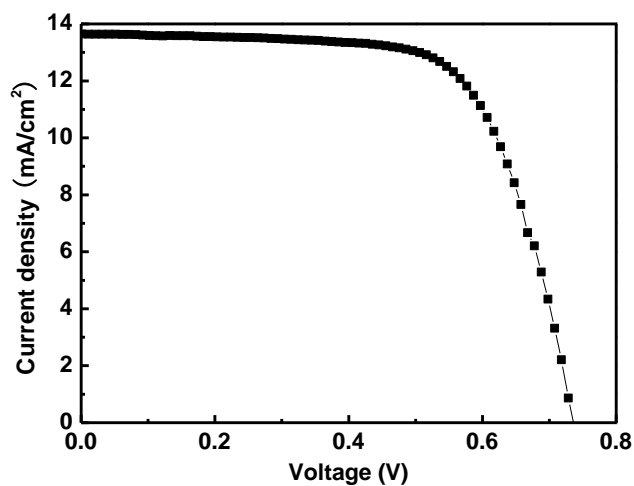

Figure S4. Characteristic photocurrent-voltage (IV) curves of dye-sensitized solar cells assembled by using the TiO<sub>2</sub> nanorod as the middle layer of the sandwiched photoanode (DSSC-R).

We make an addition work that replaces the middle layer of tubular TiO<sub>2</sub> with TiO<sub>2</sub> nanorod and get a  $J_{sc} = 13.64 \text{ mA/cm}^2$ ,  $V_{oc} = 0.74 \text{ V}$ ,  $FF = 0.68$  and  $\eta = 6.86 \%$ . The conversion efficiency is lower than that of DSSC-2 using TiO<sub>2</sub> nanotube as sandwiched layer.
